# Supplementary material for: Assessment of Satisfaction With the Electronic Health Record Among Physicians in Physician-Owned vs Non–Physician-Owned Practices
Source: PubMed Central journal article supplement (PMC9024386; doi:10.1001/jamanetworkopen.2022.8301), 2022-04-21
Supplement: jamanetwopen-e228301-s001.pdf [file jamanetwopen-e228301-s001.pdf]

## Supplementary Online Content

Rotenstein LS, Apathy N, Landon B, Bates DW. Assessment of satisfaction with the electronic health record among physicians in physician-owned vs non-physician-owned practices. *JAMA Netw Open*. 2022;5(4):e228301. doi:10.1001/jamanetworkopen.2022.8301

**eTable 1.** Differences in EHR Satisfaction by EHR Vendor and Practice Ownership

**eTable 2.** Models Estimating Associations Between EHR Satisfaction, Practice Ownership, and EHR Vendor

This supplementary material has been provided by the authors to give readers additional information about their work.

**eTable 1.** Differences in EHR Satisfaction by EHR Vendor and Practice Ownership

| <b>EHR Vendor</b> | <b>EHR Satisfaction</b>  |                                  |                                          |
|-------------------|--------------------------|----------------------------------|------------------------------------------|
|                   | <b>Overall<br/>N (%)</b> | <b>Physician-Owned<br/>N (%)</b> | <b>Non-Physician<br/>Owned<br/>N (%)</b> |
| Allscripts        | 54 (50.8)                | 44 (58.8)                        | 10 (28.5)                                |
| Athenahealth      | 66 (76.9)                | 43 (80.2)                        | 23 (67.7)                                |
| Cerner            | 43 (38.7)                | 7 (38.2)                         | 36 (38.7)                                |
| eClinicalWorks    | 84 (72.3)                | 71 (79.4)                        | 13 (56.4)                                |
| Epic              | 234 (75.0)               | 60 (77.1)                        | 174 (74.3)                               |
| NextGen           | 40 (63.2)                | 32 (79.0)                        | 8 (30.3)                                 |
| Practice Fusion   | 29 (82.4)                | 25 (82.5)                        | 4 (81.9)                                 |
| Other EHR         | 295 (82.458.2)           | 244 (61.8)                       | 51 (43.6)                                |

**eTable 2.** Models Estimating Associations Between EHR Satisfaction, Practice Ownership, and EHR Vendor

|                                                                        | <b>OR (95% CI) for EHR Satisfaction for Physician-Owned versus Non-Physician Owned</b> | <b>p-value</b> |
|------------------------------------------------------------------------|----------------------------------------------------------------------------------------|----------------|
| <b>Ownership Alone</b>                                                 | 1.52 (1.04, 2.19)                                                                      | 0.03           |
| <b>Ownership and EHR Vendor</b>                                        | 2.16 (1.36, 3.43)                                                                      | 0.001          |
| <b>Ownership, EHR Vendor and Specialty</b>                             | 2.21 (1.39, 3.52)                                                                      | 0.001          |
| <b>Ownership, EHR Vendor, Specialty, and ACO Status</b>                | 2.20 (1.38, 3.51)                                                                      | 0.001          |
| <b>Ownership, EHR Vendor, Specialty, ACO Status, and Practice Size</b> | 2.29 (1.42, 3.68)                                                                      | 0.001          |
